# Supplementary material for: Dimeric γ-AApeptides With Potent and Selective Antibacterial Activity
Source: PubMed Central journal article supplement (PMC7304243; doi:10.3389/fchem.2020.00441), 2020-06-12
Supplement: Data_Sheet_1.pdf [file Data_Sheet_1.pdf]

## Support information

### Dimeric $\gamma$ -AApeptides with potent and selective antibacterial activity

Minghui Wang,<sup>1</sup> Ruixuan Gao,<sup>1</sup> Peng Sang,<sup>1</sup> Timothy Odom,<sup>1</sup> Mengmeng Zheng,<sup>1</sup> Yan Shi,<sup>1</sup> Hai Xu,<sup>2</sup> Chuanhai Cao,<sup>3</sup> and Jianfeng Cai\*,<sup>1</sup>

<sup>1</sup>Department of Chemistry, University of South Florida, Tampa, FL, USA

<sup>2</sup>College of Chemistry and Chemical Engineering, Central South University, Changsha, Hunan, China

<sup>3</sup>College of Pharmacy, University of South Florida, Tampa, FL, USA.

### HPLC and HRMS spectra of compounds 1–14

#### Compound 1

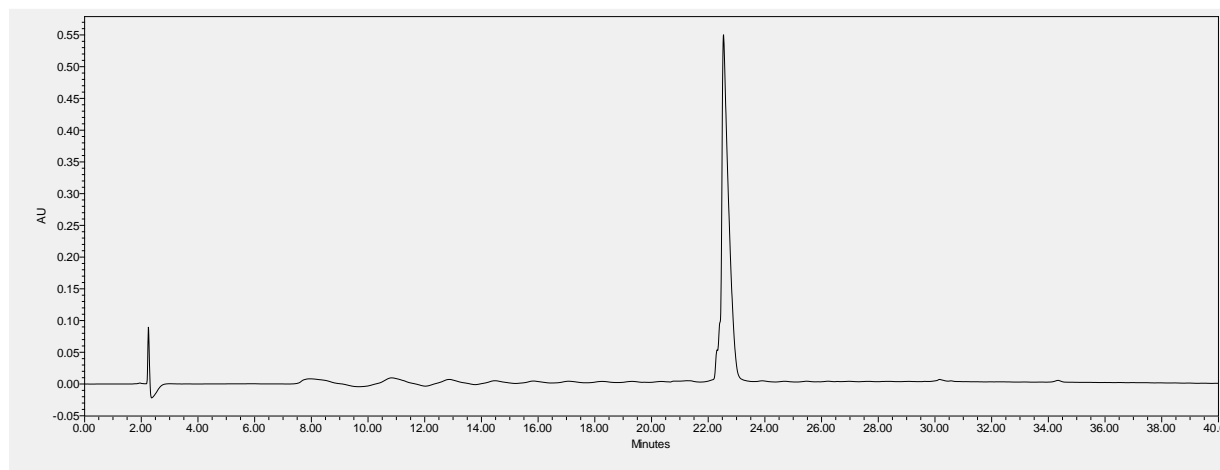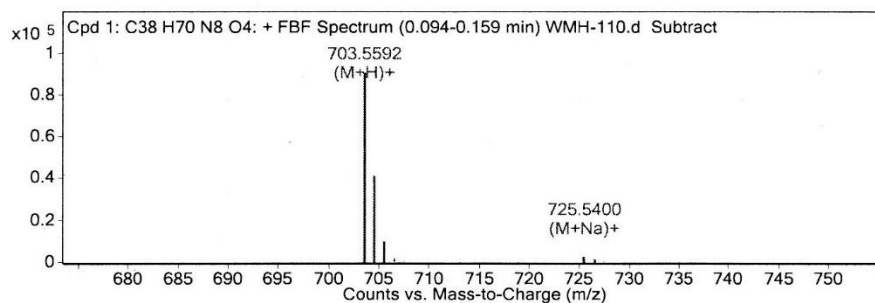

## Compound 2

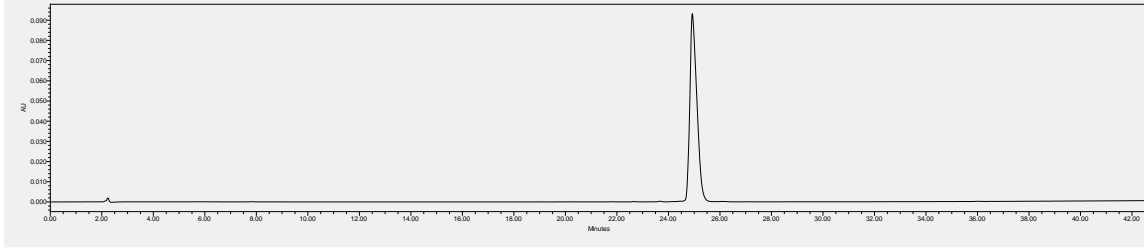

### MS Spectrum

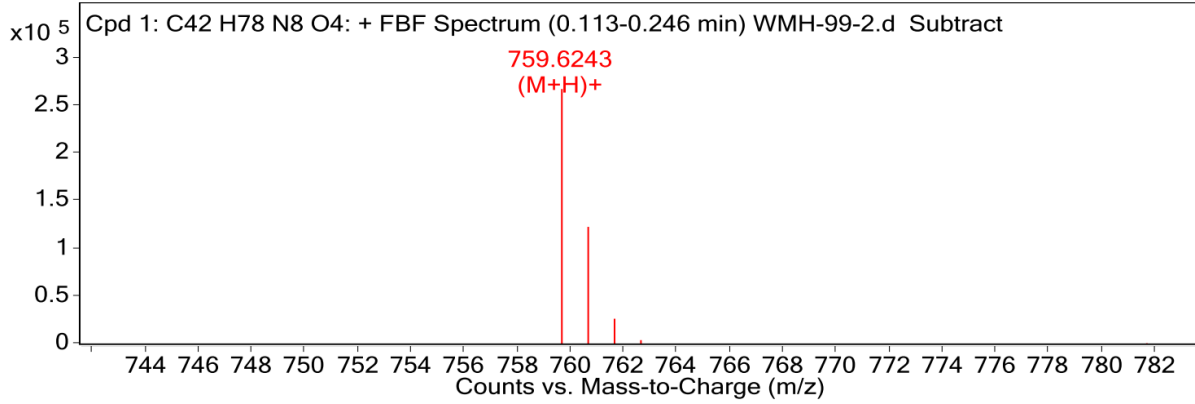

## Compound 3

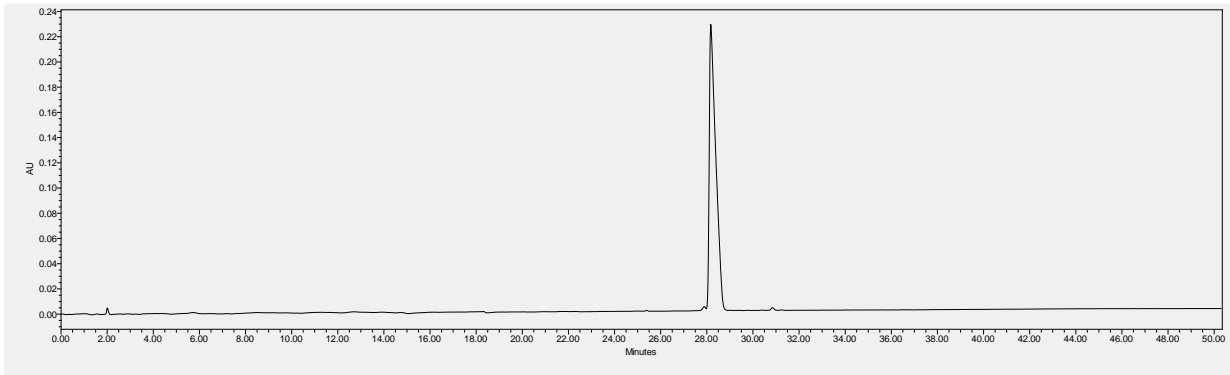

### MS Spectrum

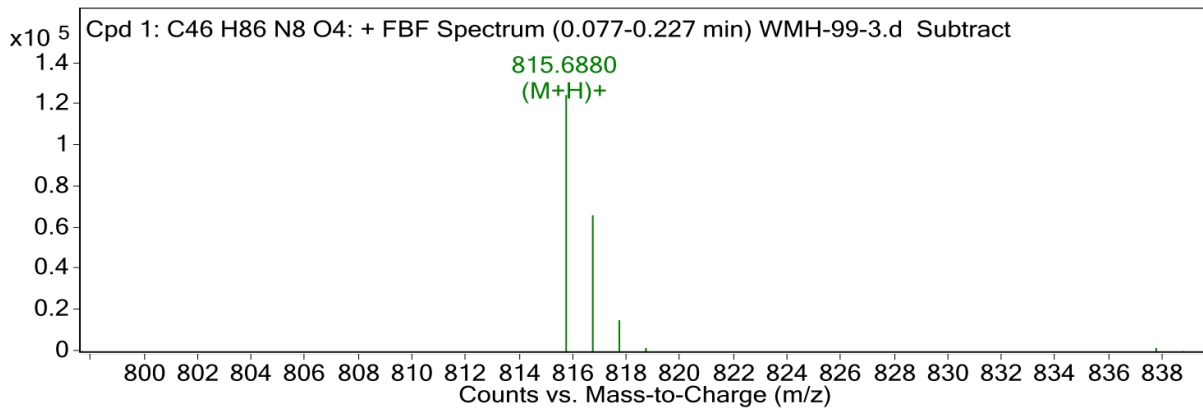

## Compound 4

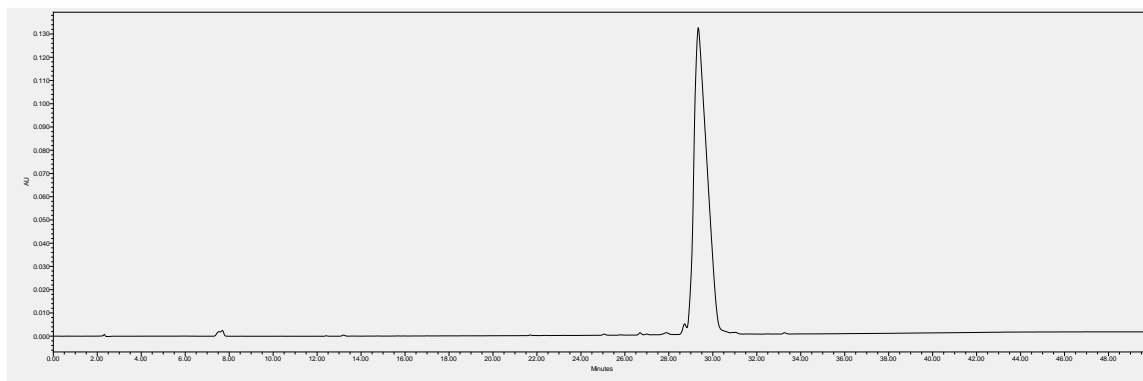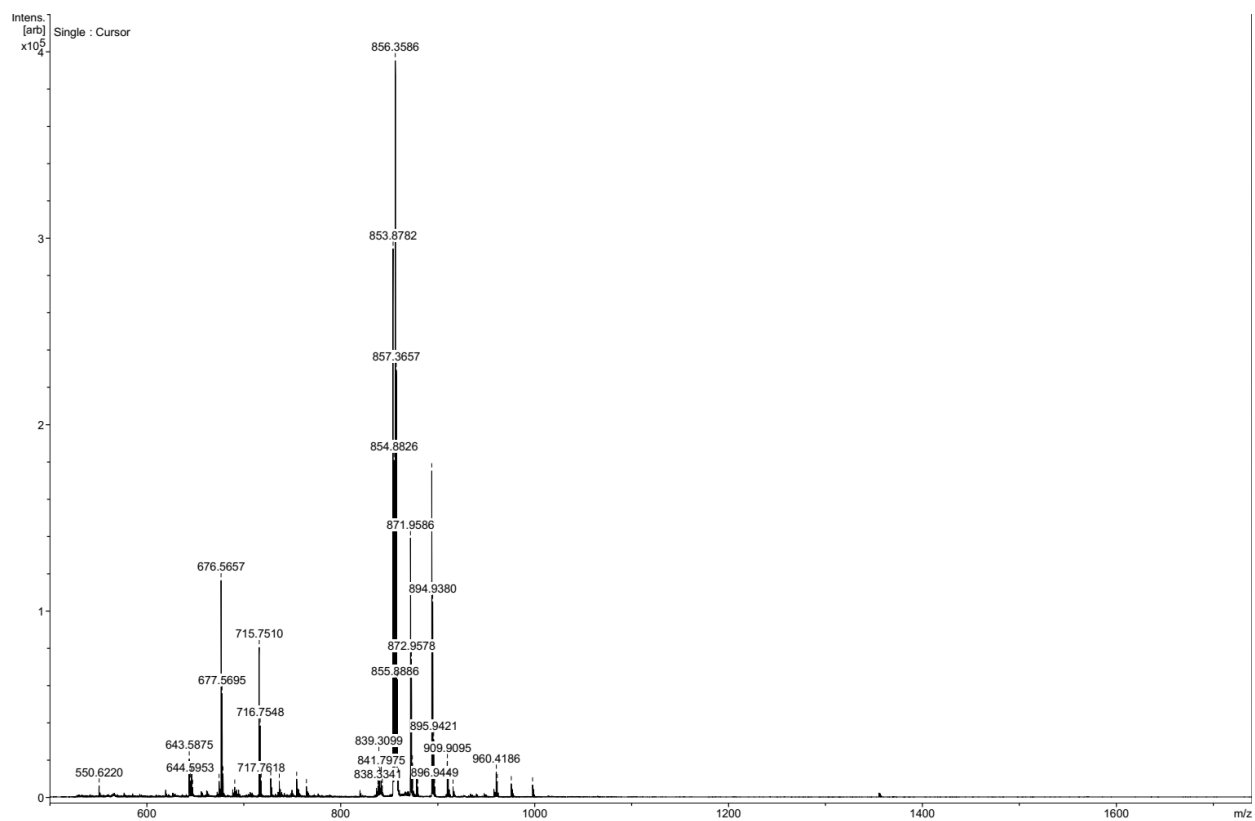

## Compound 5

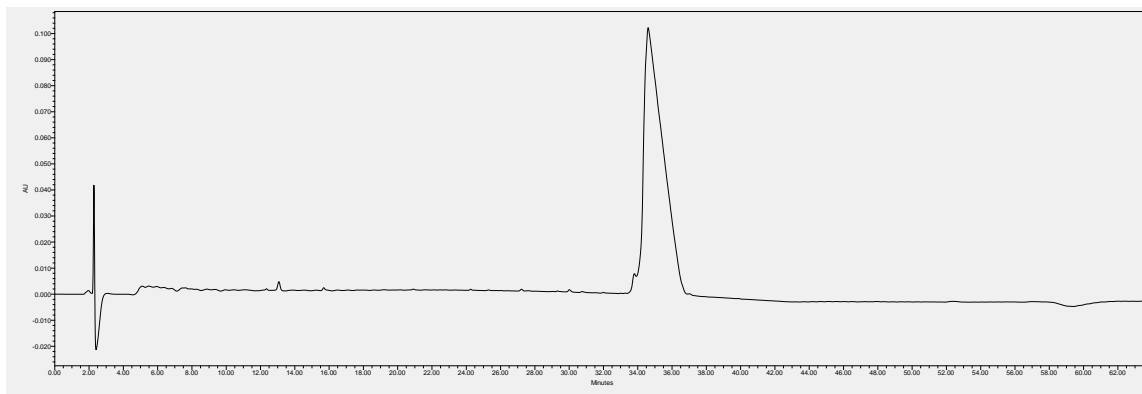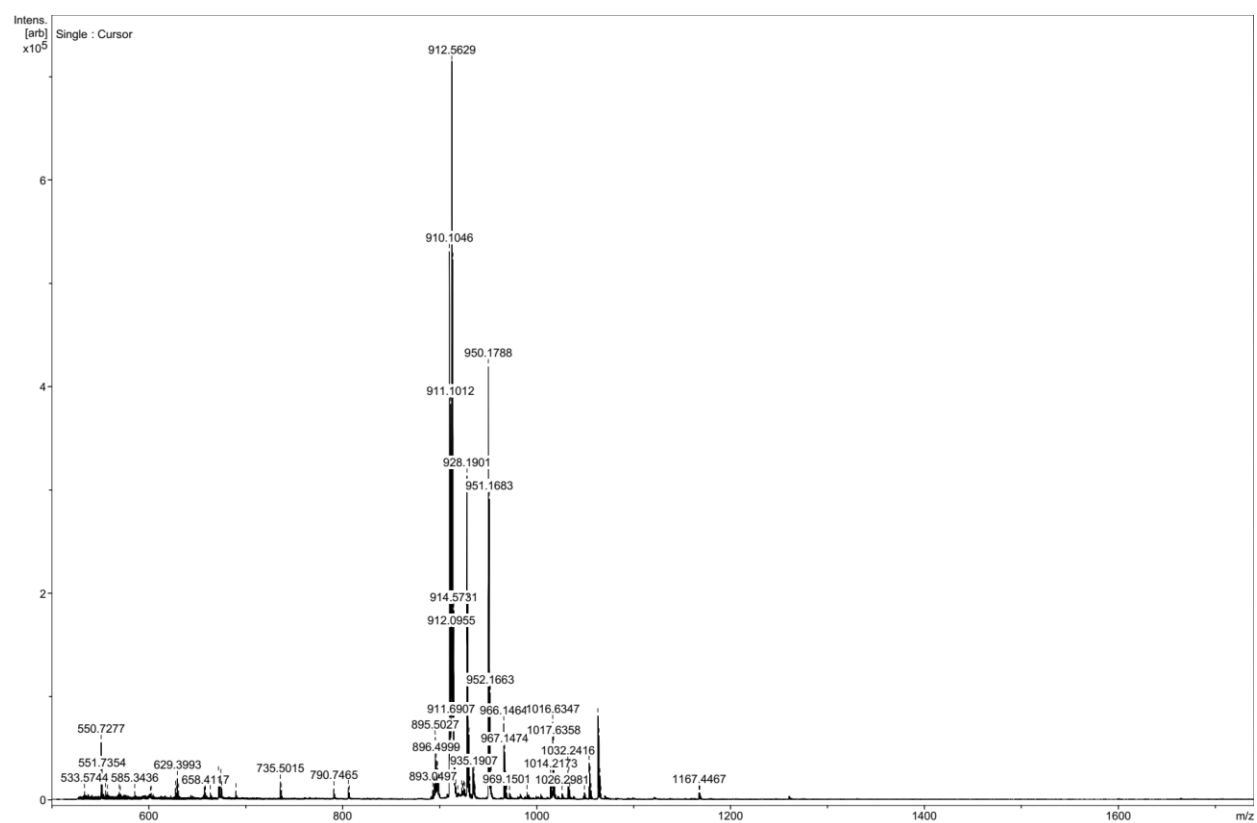

### Compound 6

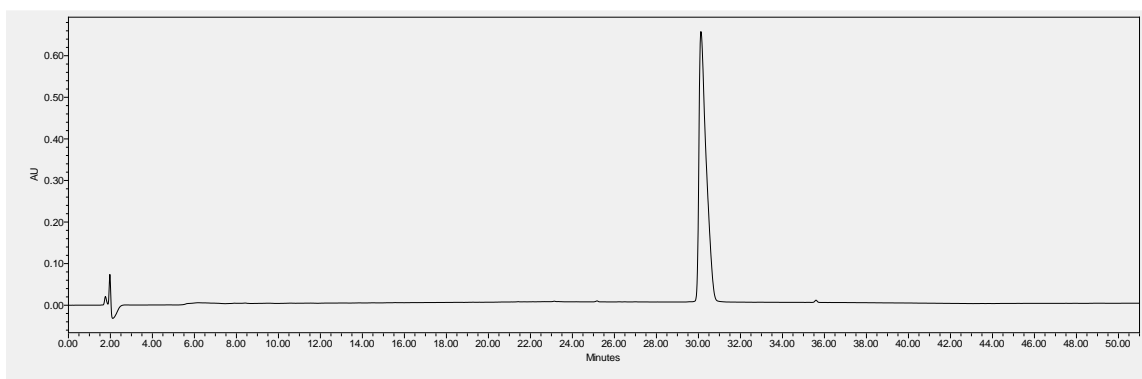

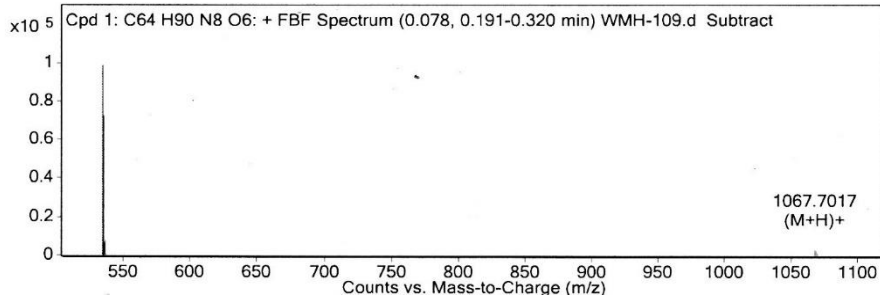

### Compound 7

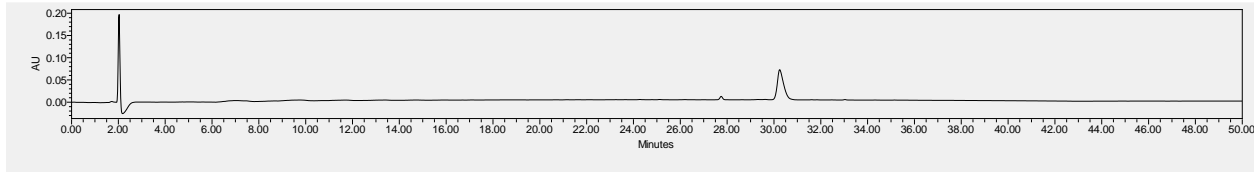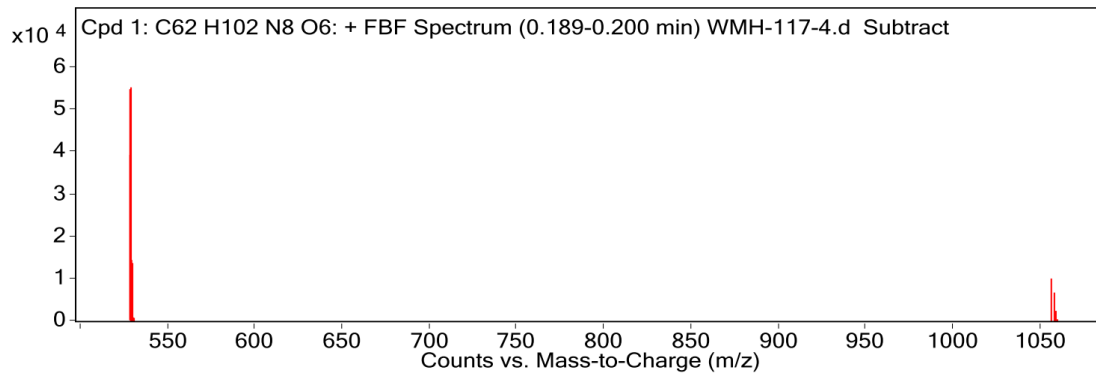

#### MS Spectrum Peak List

| <i>m/z</i> | <i>z</i> | Abund    | Formula     | Ion      |
|------------|----------|----------|-------------|----------|
| 528.4021   | 2        | 55460.61 | C62H104N8O6 | (M+2H)+2 |
| 528.9037   | 2        | 38861.81 | C62H104N8O6 | (M+2H)+2 |
| 529.4046   | 2        | 13896.05 | C62H104N8O6 | (M+2H)+2 |
| 529.9064   | 2        | 3295.72  | C62H104N8O6 | (M+2H)+2 |
| 530.4075   | 2        | 870.34   | C62H104N8O6 | (M+2H)+2 |
| 1055.7969  | 1        | 10433.45 | C62H103N8O6 | (M+H)+   |
| 1056.7993  | 1        | 7029.73  | C62H103N8O6 | (M+H)+   |
| 1057.801   | 1        | 2792.69  | C62H103N8O6 | (M+H)+   |
| 1058.8021  | 1        | 565.24   | C62H103N8O6 | (M+H)+   |
| 1059.8093  | 1        | 72.43    | C62H103N8O6 | (M+H)+   |

### Compound 8

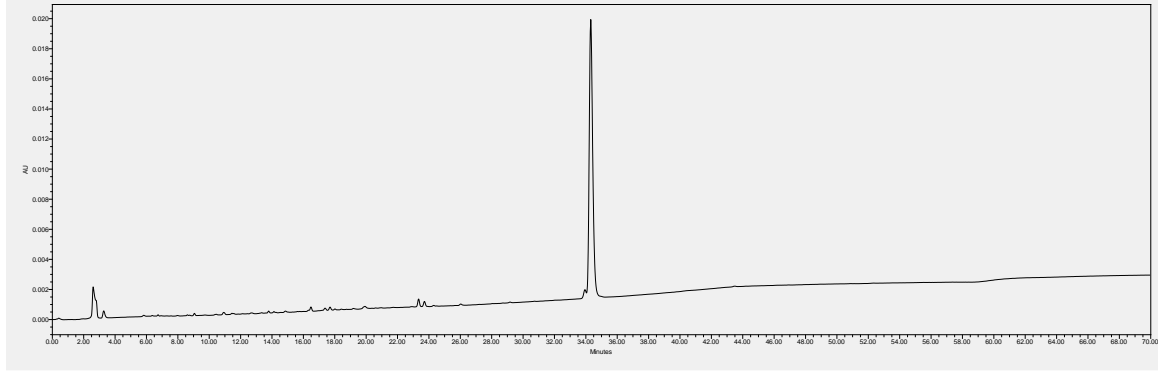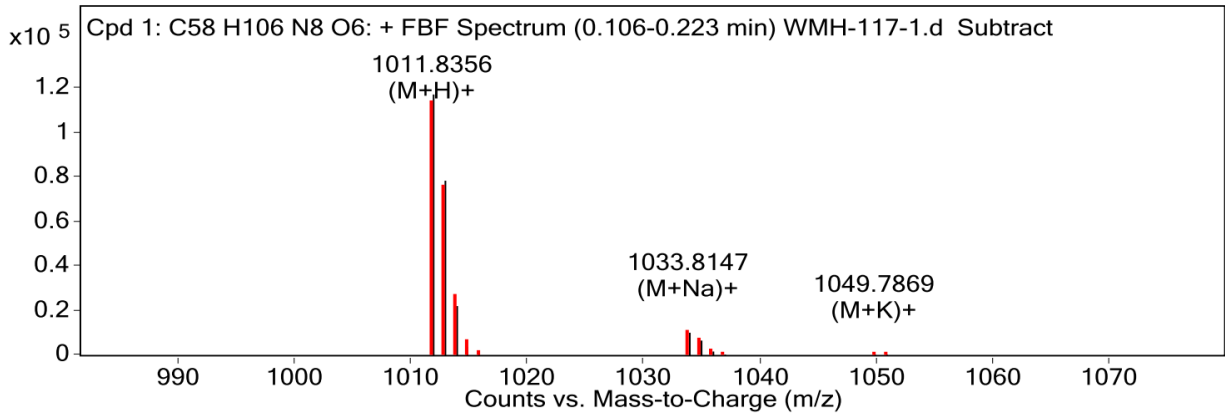

### Compound 9

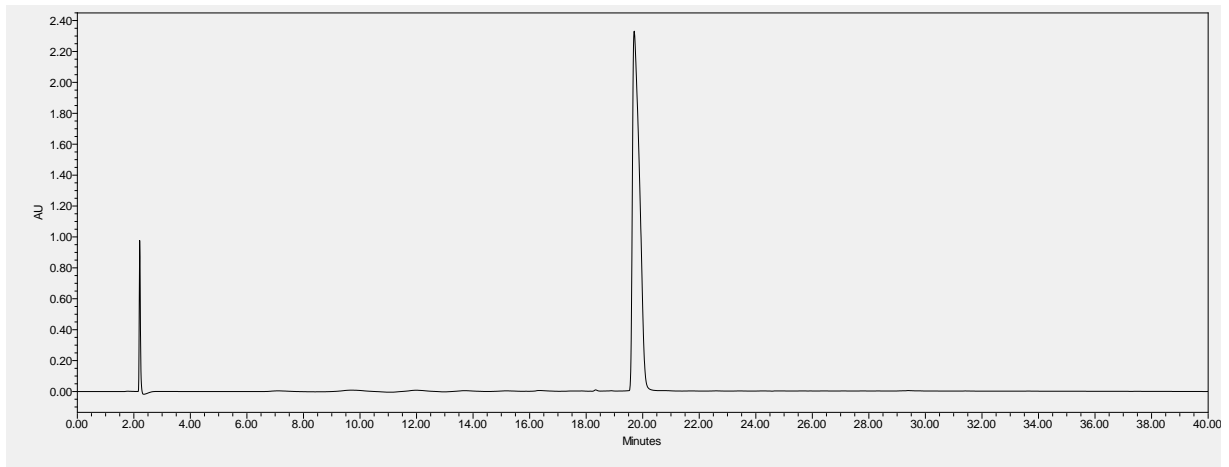

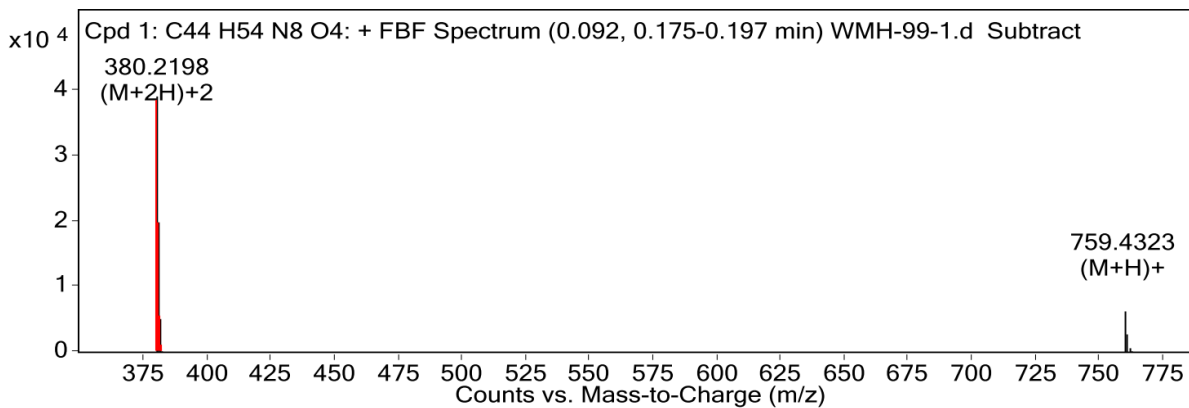

### Compound 10

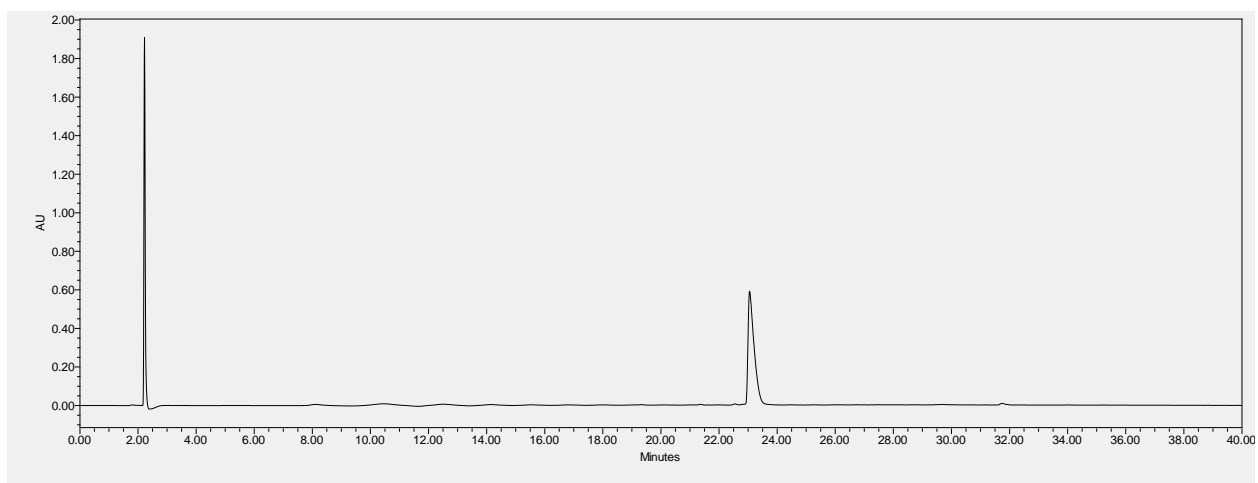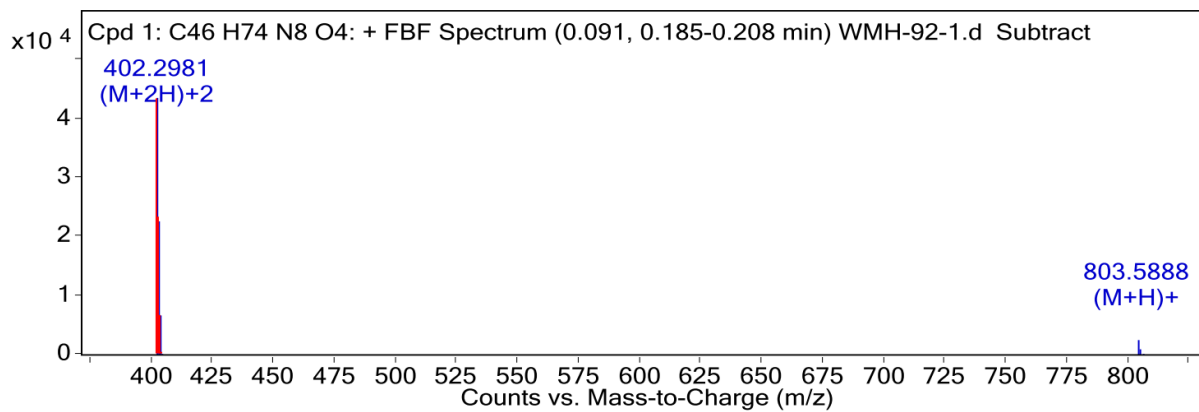

### Compound 11

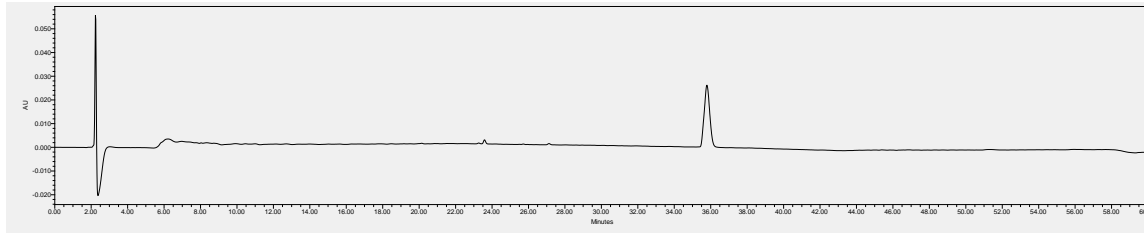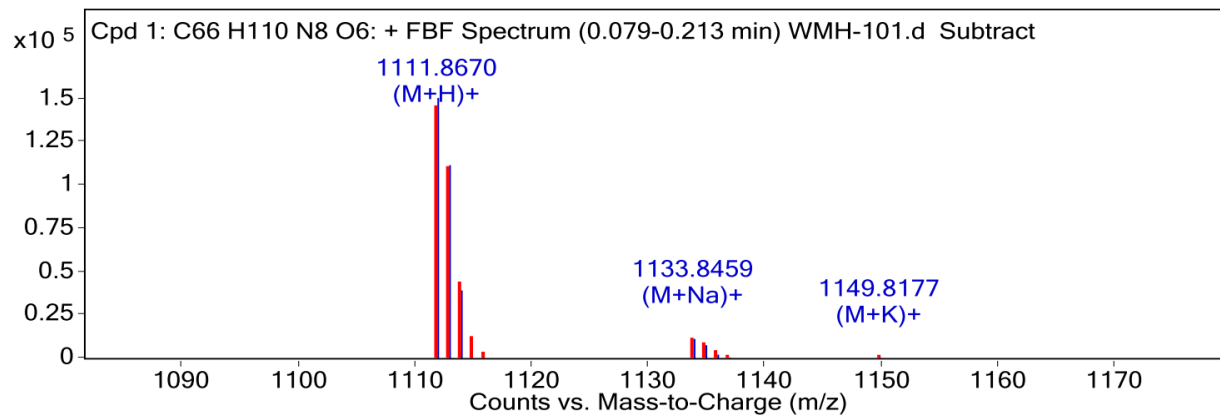

### Compound 12

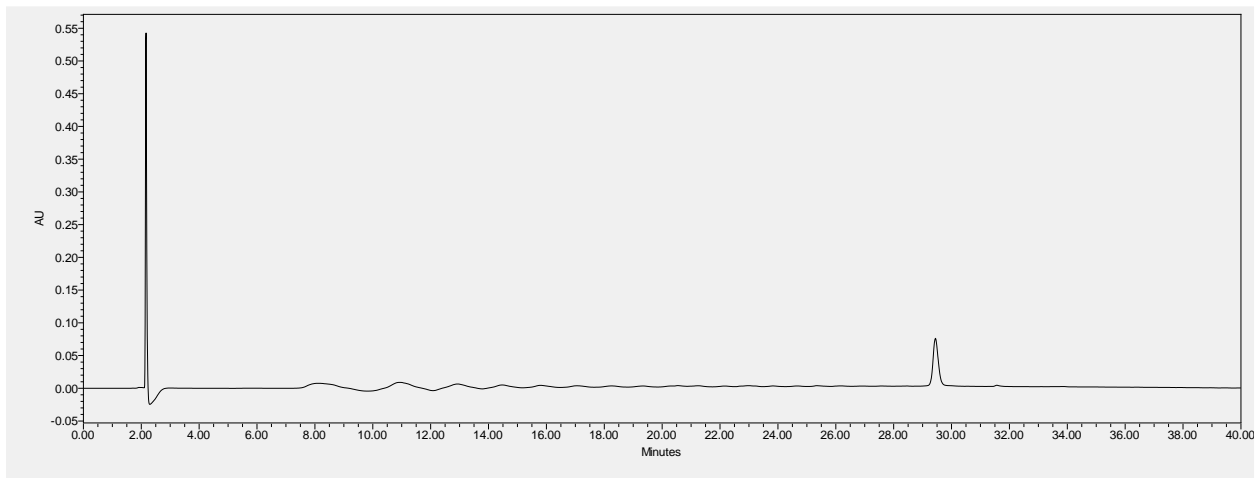



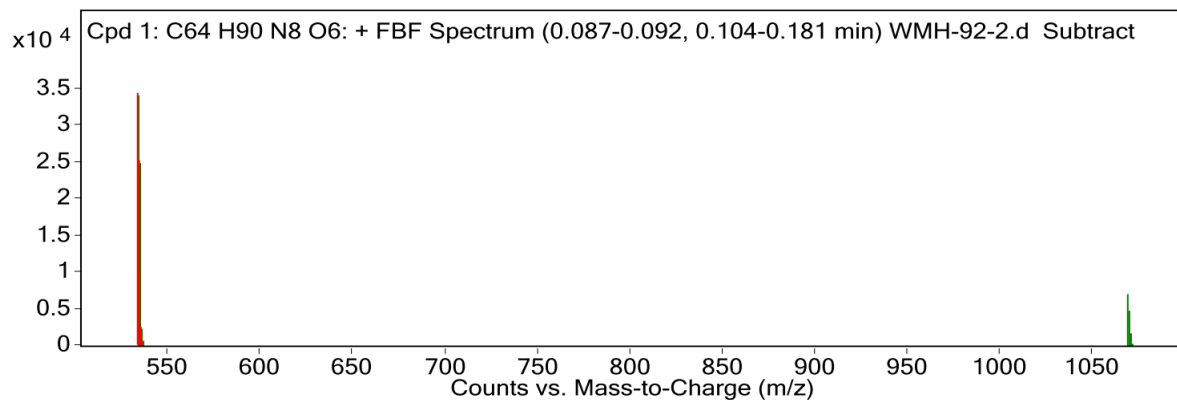

### MS Spectrum Peak List

| m/z       | z | Abund    | Formula                                                       | Ion                  |
|-----------|---|----------|---------------------------------------------------------------|----------------------|
| 534.355   | 2 | 34149.53 | C <sub>64</sub> H <sub>92</sub> N <sub>8</sub> O <sub>6</sub> | (M+2H) <sup>2+</sup> |
| 534.8564  | 2 | 24870.26 | C <sub>64</sub> H <sub>92</sub> N <sub>8</sub> O <sub>6</sub> | (M+2H) <sup>2+</sup> |
| 535.3578  | 2 | 9512.24  | C <sub>64</sub> H <sub>92</sub> N <sub>8</sub> O <sub>6</sub> | (M+2H) <sup>2+</sup> |
| 535.8598  | 2 | 2544.69  | C <sub>64</sub> H <sub>92</sub> N <sub>8</sub> O <sub>6</sub> | (M+2H) <sup>2+</sup> |
| 536.3635  | 2 | 750.05   | C <sub>64</sub> H <sub>92</sub> N <sub>8</sub> O <sub>6</sub> | (M+2H) <sup>2+</sup> |
| 1067.703  | 1 | 7232.37  | C <sub>64</sub> H <sub>91</sub> N <sub>8</sub> O <sub>6</sub> | (M+H) <sup>+</sup>   |
| 1068.7055 | 1 | 4829.71  | C <sub>64</sub> H <sub>91</sub> N <sub>8</sub> O <sub>6</sub> | (M+H) <sup>+</sup>   |
| 1069.7082 | 1 | 1799.24  | C <sub>64</sub> H <sub>91</sub> N <sub>8</sub> O <sub>6</sub> | (M+H) <sup>+</sup>   |
| 1070.7105 | 1 | 390.43   | C <sub>64</sub> H <sub>91</sub> N <sub>8</sub> O <sub>6</sub> | (M+H) <sup>+</sup>   |
| 1071.7118 | 1 | 66.57    | C <sub>64</sub> H <sub>91</sub> N <sub>8</sub> O <sub>6</sub> | (M+H) <sup>+</sup>   |

### Compound 13

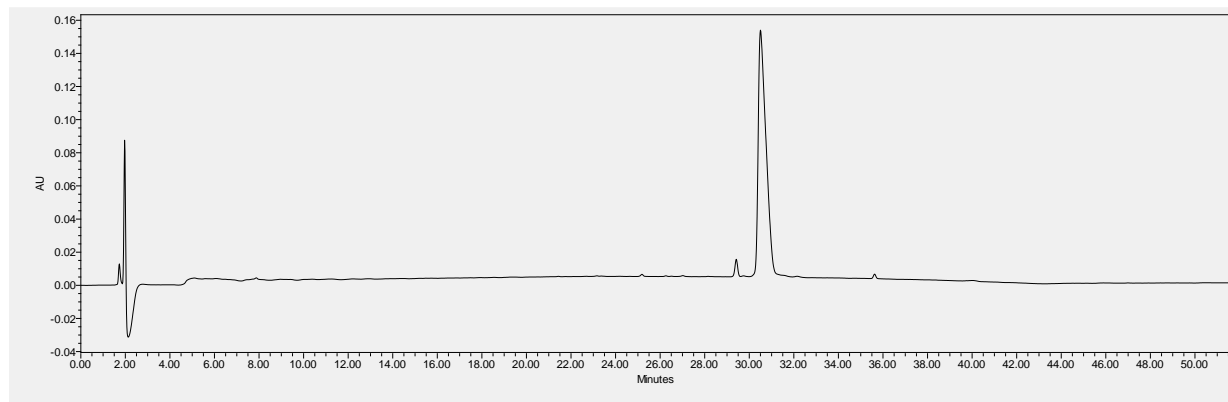

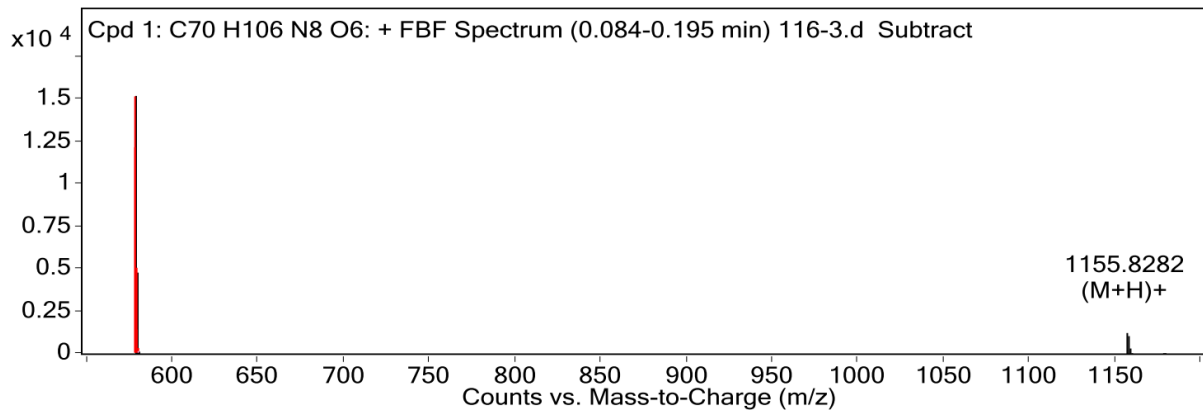

### Compound 14

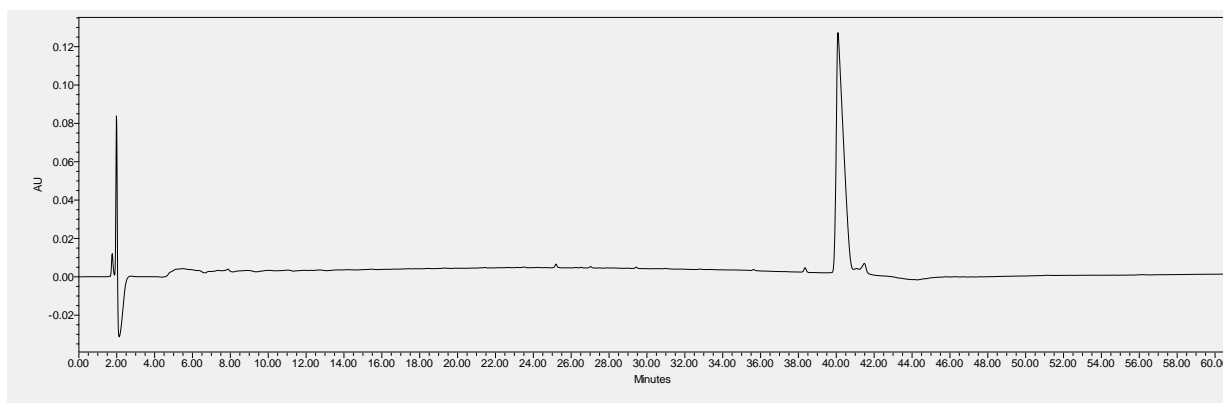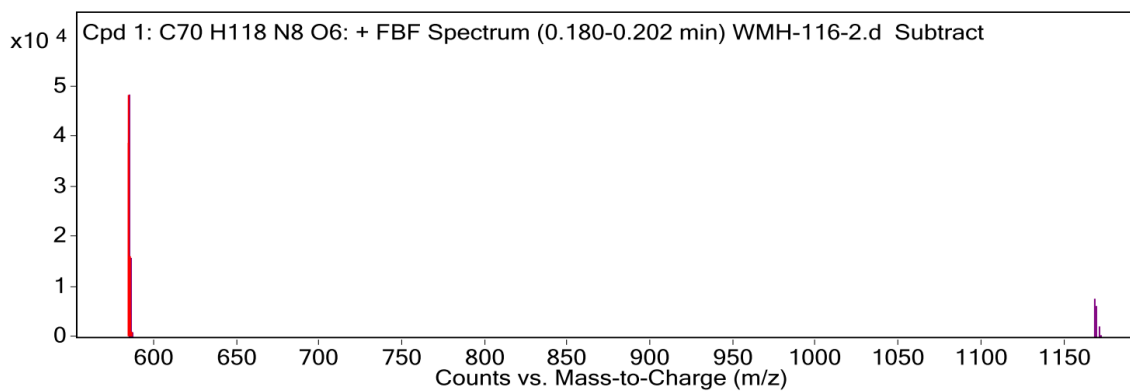

### MS Spectrum Peak List

| m/z       | z | Abund    | Formula     | Ion                   |
|-----------|---|----------|-------------|-----------------------|
| 584.4647  | 2 | 48529.57 | C70H120N8O6 | (M+2H) <sup>+</sup> 2 |
| 584.9662  | 2 | 38254.34 | C70H120N8O6 | (M+2H) <sup>+</sup> 2 |
| 585.4673  | 2 | 15949.09 | C70H120N8O6 | (M+2H) <sup>+</sup> 2 |
| 585.9697  | 2 | 4253.4   | C70H120N8O6 | (M+2H) <sup>+</sup> 2 |
| 586.4716  | 2 | 1070.64  | C70H120N8O6 | (M+2H) <sup>+</sup> 2 |
| 586.9726  | 2 | 213.65   | C70H120N8O6 | (M+2H) <sup>+</sup> 2 |
| 1167.9215 | 1 | 7748.92  | C70H119N8O6 | (M+H) <sup>+</sup>    |
| 1168.924  | 1 | 6465.25  | C70H119N8O6 | (M+H) <sup>+</sup>    |
| 1169.9276 | 1 | 2452.9   | C70H119N8O6 | (M+H) <sup>+</sup>    |
| 1170.9304 | 1 | 635.12   | C70H119N8O6 | (M+H) <sup>+</sup>    |
